# Supplementary material
Source: MDPI journal article supplement (https://www.mdpi.com/2227-9717/10/3/523)
Supplement: s1 [file s1]

Supplementary material

**Table S1.** Equations of mathematical model for metal ion biosorption efficiency  $R(\%)$  (a) and biosorption capacity  $q(\text{mg/g})$  in coded (a) and real (b) coordinates.

| Sorbent                          | Metal ion | Model equations (coded variables)                                                                                                                                                   |       |
|----------------------------------|-----------|-------------------------------------------------------------------------------------------------------------------------------------------------------------------------------------|-------|
|                                  |           | Metal ion biosorption efficiency, $R(\%)$                                                                                                                                           |       |
| Soybean biomass                  | Pb(II)    | $R = 64.72 + 3.24A + 4.26B - 5.91C + 4.33D + 6.89A^2 - 1.48B^2$                                                                                                                     | (1a)  |
|                                  | Cd(II)    | $R = 72.12 + 3.51A + 4.37B - 6.67C + 3.99D - 0.34E - 6.69A^2 + 1.70CE$                                                                                                              | (2a)  |
|                                  | Zn(II)    | $R = 56.03 + 2.19A + 3.61B - 5.84C + 3.15D - 0.62E - 5.02A^2 - 1.2B^2 + 1.35CE$                                                                                                     | (3a)  |
| Soybean waste biomass            | Pb(II)    | $R = 63.22 + 4.92A + 4.76B - 5.33C + 4.27D - 5.91A^2 - 1.21B^2$                                                                                                                     | (4a)  |
|                                  | Cd(II)    | $R = 71 + 1.95A + 3.99B - 5.37C + 2.94D + 0.31E - 6.04A^2 - 2.28B^2 + 1.46C^2 + 1.28E^2 + 1.54CE$                                                                                   | (5a)  |
|                                  | Zn(II)    | $R = 61.16 + 4.6A + 3.49B - 5.83C + 2.76D - 6.08A^2 - 2.68B^2 - 1.95D^2$                                                                                                            | (6a)  |
|                                  |           | Biosorption capacity, $q \text{ (mg/g)}$                                                                                                                                            |       |
| Soybean biomass                  | Pb(II)    | $q = 14.85 + 1.58A - 2.5B + 3.61C + 0.99D + 1.04E - 1.08A^2 - 0.99BC - 0.58BD$                                                                                                      | (7a)  |
|                                  | Cd(II)    | $q = 10.6 + 1.03A - 2.18B + 4.10C + 0.089D + 2.14E - 1.07A^2 + 1.26D^2 + 0.88E^2 + 0.48AC - 0.67BC + 1.64CE$                                                                        | (8a)  |
|                                  | Zn(II)    | $q = 8.75 + 0.054A - 1.39B + 1.56C + 0.47D + 0.047E - 0.6A^2 - 0.7B^2 - 0.66C^2 - 0.45D^2 - 0.7BC - 0.26BE - 0.35CE$                                                                | (9a)  |
| Soybean waste biomass            | Pb(II)    | $q = 18.39 + 1.76A - 3.33B + 4.17C + 0.38D + 1.01E - 1.69A^2 + 0.83BC - 0.74DE$                                                                                                     | (10a) |
|                                  | Cd(II)    | $q = 15.94 + 1.06A - 1.69B + 4.92C + 0.069D + 3.62E - 2.05A^2 - 1.94B^2 + 0.6D^2 - 0.38BC - 0.91CD + 2.54CE + 0.84DE$                                                               | (11a) |
|                                  | Zn(II)    | $q = 10.54 + 0.86A - 1.86B + 2.01C - 0.25D + 1.24E - 1.27A^2 - 0.35B^2 - 0.47C^2 - 0.33D^2 + 0.54E^2 - 0.73BC - 0.53BE - 0.38DE$                                                    | (12a) |
| Model equations (real variables) |           |                                                                                                                                                                                     |       |
|                                  |           | Metal ion biosorption efficiency, $R \text{ (%)}$                                                                                                                                   |       |
| Soybean biomass                  | Pb(II)    | $R = -41.09 + 41.435x_1 + 1.808x_2 - 0.069x_3 + 0.118x_4 - 5.15x_1^2 - 0.028x_2^2$                                                                                                  | (1b)  |
|                                  | Cd(II)    | $R = -2.125 + 40.588x_1 + 0.594x_2 - 0.25x_3 - 0.109x_4 - 0.499x_5 - 5.007x_1^2 + 3.869x_3x_5$                                                                                      | (2b)  |
|                                  | Zn(II)    | $R = -5.948 + 30.06x_1 + 1.49x_2 - 0.237x_3 + 0.086x_4 - 0.451x_5 - 3.75x_1^2 - 0.022x_2^2 - 0.004x_3x_5$                                                                           | (3b)  |
| Soybean waste biomass            | Pb(II)    | $R = -38.034 + 37.397x_1 + 1.65x_2 - 0.063x_3 + 0.116x_4 - 4.42x_1^2 - 0.022x_2^2$                                                                                                  | (4b)  |
|                                  | Cd(II)    | $R = 6.73 + 35.599x_1 + 2.435x_2 - 0.385x_3 - 0.08x_4 - 1.189x_5 - 4.52x_1^2 - 0.043x_2^2 + 0.00073x_3^2 + 0.014x_5^2 + 0.0036x_3x_5$                                               | (5b)  |
|                                  | Zn(II)    | $R = -57.05 + 38.11x_1 + 2.703x_2 - 0.141x_3 + 0.341x_4 - 4.551x_1^2 - 0.0495x_2^2 - 0.0015x_4^2$                                                                                   | (6b)  |
|                                  |           | Biosorption capacity, $q \text{ (mg/g)}$                                                                                                                                            |       |
| Soybean biomass                  | Pb(II)    | $q = -20.71 + 7.45x_1 + 0.197x_2 + 0.078x_3 + 0.075x_4 + 0.11x_5 - 0.81x_1^2 - 0.0016x_2x_3 - 0.0022x_2x_4$                                                                         | (7b)  |
|                                  | Cd(II)    | $q = 12.05 + 5.83x_1 - 0.062x_2 - 0.004x_3 - 0.169x_4 - 0.761x_5 - 0.803x_1^2 - 0.001x_4^2 - 0.009x_5^2 + 0.009x_1x_3 - 0.002x_2x_3 + 0.004x_3x_5$                                  | (8b)  |
|                                  | Zn(II)    | $q = -24.13 + 3.44x_1 + 0.755x_2 + 0.2x_3 + 0.075x_4 + 0.189x_5 - 0.452x_1^2 - 0.013x_2^2 - 0.0004x_3^2 - 0.00036x_4^2 - 0.0023x_2x_3 - 0.0038x_2x_5 - 0.001x_3x_5$                 | (9b)  |
| Soybean waste biomass            | Pb(II)    | $q = -21.07 + 11x_1 - 0.168x_2 + 0.079x_3 + 0.069x_4 + 0.303x_5 - 1.263x_1^2 - 0.00133x_2x_3 - 0.002x_4x_5$                                                                         | (10b) |
|                                  | Cd(II)    | $q = -25.35 + 12.4x_1 + 1.517x_2 + 0.022x_3 - 0.082x_4 - 0.533x_5 - 1.53x_1^2 - 0.036x_2^2 + 0.0005x_4^2 - 0.0011x_2x_3 - 0.00053x_3x_4 + 0.006x_3x_5 + 0.0024x_4x_5$               | (11b) |
|                                  | Zn(II)    | $q = -23.47 + 7.187x_1 + 0.515x_2 + 0.165x_3 + 0.068x_4 + 0.069x_5 - 0.948x_1^2 - 0.0065x_2^2 - 0.0003x_3^2 - 0.002x_4^2 + 0.006x_5^2 - 0.0024x_1x_3 - 0.0077x_2x_5 - 0.0011x_4x_5$ | (12b) |

**Table S2.** Results of tests for model adequacy.

| Source                              | Sum of Squares | Degrees of freedom | Square mean  | F     | Prob>F   |
|-------------------------------------|----------------|--------------------|--------------|-------|----------|
| Soybean biomass, Pb(II), R(%)       |                |                    |              |       |          |
| Mean                                | 1.445E+005     | 1                  | 1.445E + 005 |       |          |
| Linear                              | 3751.6         | 5                  | 714.32       | 8.65  | < 0.0001 |
| 2Fi                                 | 79.53          | 10                 | 7.95         | 0.073 | 0.9999   |
| Quadratic                           | 2577.16        | 5                  | 515.43       | 22.01 | < 0.0001 |
| Cubic                               | 413.45         | 15                 | 27.56        | 1.67  | 0.2210   |
| Residual                            | 148.69         | 9                  | 16.52        |       |          |
| Total                               | 1.513E + 0.005 | 45                 | 3362.51      |       |          |
| Soybean waste biomass, Pb(II), R(%) |                |                    |              |       |          |
| Mean                                | 1.43E + 0.05   | 1                  | 1.43 + 005   |       |          |
| Linear                              | 4050.30        | 5                  | 810.06       | 13.26 | < 0.0001 |
| 2Fi                                 | 90.27          | 10                 | 9.03         | 0.11  | 0.9995   |
| Quadratic                           | 1867.72        | 5                  | 373.54       | 21.14 | < 0.0001 |
| Cubic                               | 276.36         | 15                 | 18.42        | 1.12  | 0.4449   |
| Residual                            | 147.71         | 9                  | 16.41        |       |          |
| Total                               | 1.494E + 005   | 45                 | 3320.39      |       |          |
| Soybean biomass, Cd(II), R(%)       |                |                    |              |       |          |
| Mean                                | 1.941E + 005   | 1                  | 1.941E + 005 |       |          |
| Linear                              | 3985.29        | 5                  | 797.06       | 10.14 | < 0.0001 |
| 2Fi                                 | 145.61         | 10                 | 14.56        | 0.14  | 0.9986   |
| Quadratic                           | 2516.46        | 5                  | 503.29       | 29.99 | < 0.0001 |
| Cubic                               | 381.81         | 15                 | 25.45        | 10.96 | 0.0005   |
| Residual                            | 20.90          | 9                  | 2.32         |       |          |
| Total                               | 2.012E + 005   | 45                 | 4470.53      |       |          |
| Soybean waste biomass, Cd(II), R(%) |                |                    |              |       |          |
| Mean                                | 1.938E + 005   | 1                  | 1.938E + 005 |       |          |
| Linear                              | 2479.76        | 5                  | 495.95       | 6.11  | 0.0003   |
| 2Fi                                 | 116.85         | 10                 | 11.69        | 0.11  | 0.9996   |
| Quadratic                           | 2612.13        | 5                  | 552.43       | 28.58 | < 0.0001 |
| Cubic                               | 432.74         | 15                 | 28.85        | 43.93 | < 0.0001 |
| Residual                            | 5.91           | 9                  | 0.66         |       |          |
| Total                               | 1.995+005      | 45                 | 4432.65      |       |          |
| Soybean biomass, Zn(II), R(%)       |                |                    |              |       |          |
| Mean                                | 1.127E + 005   | 1                  | 1.127E + 005 |       |          |
| Linear                              | 2693.90        | 5                  | 538.78       | 11.20 | < 0.0001 |
| 2Fi                                 | 90.81          | 10                 | 9.08         | 0.15  | 0.9985   |
| Quadratic                           | 1405.51        | 5                  | 281.10       | 17.79 | < 0.0001 |
| Cubic                               | 360.13         | 15                 | 24.01        | 11.34 | 0.0004   |
| Residual                            | 19.06          | 9                  | 2.12         |       |          |
| Total                               | 1.173 + 005    | 45                 | 2605.77      |       |          |
| Soybean waste biomass, Zn(II), R(%) |                |                    |              |       |          |
| Mean                                | 1.163E + 005   | 1                  | 1.163E + 005 |       |          |
| Linear                              | 3244.33        | 5                  | 648.87       | 10.44 | < 0.0001 |
| 2Fi                                 | 38.69          | 10                 | 3.87         | 0.047 | 1.0000   |
| Quadratic                           | 1969.93        | 5                  | 393.99       | 22.73 | < 0.0001 |
| Cubic                               | 253.49         | 15                 | 16.90        | 0.94  | 0.5636   |
| Residual                            | 162.58         | 9                  | 18.06        |       |          |
| Total                               | 1.220E + 005   | 45                 | 2711.14      |       |          |
| Soybean biomass, Pb(II), q(mg/g)    |                |                    |              |       |          |
| Mean                                | 8575.32        | 1                  | 8575.32      |       |          |
| Linear                              | 1032.18        | 5                  | 206.44       | 42.14 | < 0.0001 |

|                                                 |          |    |         |       |          |
|-------------------------------------------------|----------|----|---------|-------|----------|
| 2Fi                                             | 56.53    | 10 | 5.65    | 1.18  | 0.3444   |
| Quadratic                                       | 69.09    | 5  | 13.82   | 4.73  | 0.0038   |
| Cubic                                           | 19.91    | 15 | 1.33    | 0.24  | 0.9929   |
| Residual                                        | 50.15    | 9  | 5.17    |       |          |
| Total                                           | 9803.18  | 45 | 217.85  |       |          |
| Soybean waste biomass, Pb(II), $q(\text{mg/g})$ |          |    |         |       |          |
| Mean                                            | 12653.80 | 1  | 12653.8 |       |          |
| Linear                                          | 1416.79  | 5  | 283.36  | 39.65 | < 0.0001 |
| 2Fi                                             | 43.56    | 10 | 4.36    | 0.54  | 0.8493   |
| Quadratic                                       | 155.82   | 5  | 31.16   | 9.43  | < 0.0001 |
| Cubic                                           | 28.4     | 15 | 1.89    | 0.33  | 0.9704   |
| Residual                                        | 50.91    | 9  | 5.66    |       |          |
| Total                                           | 14349.28 | 45 | 318.87  |       |          |
| Soybean biomass, Cd(II), $q(\text{mg/g})$       |          |    |         |       |          |
| Mean                                            | 6074.94  | 1  | 6074.94 |       |          |
| Linear                                          | 1180.7   | 5  | 236.14  | 26.61 | < 0.0001 |
| 2Fi                                             | 112.12   | 10 | 11.21   | 1.39  | 0.2339   |
| Quadratic                                       | 216.86   | 5  | 43.37   | 60.84 | < 0.0001 |
| Cubic                                           | 15.49    | 15 | 1.03    | 5.73  | 0.0060   |
| Residual                                        | 1.62     | 9  | 0.18    |       |          |
| Total                                           | 7601.72  | 45 | 168.93  |       |          |
| Soybean waste biomass, Cd(II), $q(\text{mg/g})$ |          |    |         |       |          |
| Mean                                            | 7230.14  | 1  | 7230.14 |       |          |
| Linear                                          | 1786.39  | 5  | 357.28  | 19.45 | < 0.0001 |
| 2Fi                                             | 267.35   | 10 | 26.73   | 1.73  | 0.1219   |
| Quadratic                                       | 421.55   | 5  | 84.31   | 73.80 | < 0.0001 |
| Cubic                                           | 22.17    | 15 | 1.48    | 2.54  | 0.0808   |
| Residual                                        | 5.25     | 9  | 0.58    |       |          |
| Total                                           | 9732.84  | 45 | 216.29  |       |          |
| Soybean biomass, Zn(II), $q(\text{mg/g})$       |          |    |         |       |          |
| Mean                                            | 1857.31  | 1  | 1857.31 |       |          |
| Linear                                          | 199.40   | 5  | 39.88   | 20.16 | < 0.0001 |
| 2Fi                                             | 23.15    | 10 | 2.31    | 1.24  | 0.3066   |
| Quadratic                                       | 39.20    | 5  | 7.84    | 12.71 | < 0.0001 |
| Cubic                                           | 5.83     | 15 | 0.39    | 0.39  | 0.9486   |
| Residual                                        | 8.97     | 9  | 1.00    |       |          |
| Total                                           | 2133.85  | 45 | 47.42   |       |          |
| Soybean waste biomass, Zn(II), $q(\text{mg/g})$ |          |    |         |       |          |
| Mean                                            | 3435.69  | 1  | 34.36   |       |          |
| Linear                                          | 394.48   | 5  | 78.90   | 17.94 | < 0.0001 |
| 2Fi                                             | 31.52    | 10 | 3.15    | 0.65  | 0.7567   |
| Quadratic                                       | 116.80   | 5  | 23.26   | 24.21 | < 0.0001 |
| Cubic                                           | 22.24    | 15 | 1.48    | 14.55 | 0.0002   |
| Residual                                        | 0.92     | 9  | 0.10    |       |          |
| Total                                           | 4001.66  | 45 | 88.93   |       |          |

**Table S3.** ANOVA for the polynomial (quadratic) model for  $R(\%)$  in case of Pb(II) retention on soybean biomass and soybean waste biomass, respectively.

| Source                                 | Sum of Squares | Degrees of freedom | Square mean | F      | Prob>F  |
|----------------------------------------|----------------|--------------------|-------------|--------|---------|
| Soybean biomass, Pb(II), $R(\%)$       |                |                    |             |        |         |
| Model                                  | 6066.99        | 6                  | 1011.17     | 53.11  | <0.0001 |
| A                                      | 453.62         | 1                  | 453.62      | 23.83  | <0.0001 |
| B                                      | 787.61         | 1                  | 787.61      | 41.37  | <0.0001 |
| C                                      | 1515.02        | 1                  | 1515.02     | 79.58  | <0.0001 |
| D                                      | 813.50         | 1                  | 813.50      | 42.73  | <0.0001 |
| A <sup>2</sup>                         | 2493.88        | 1                  | 2493.88     | 131.0  | <0.0001 |
| B <sup>2</sup>                         | 114.79         | 1                  | 114.79      | 6.03   | <0.0188 |
| Residual                               | 723.42         | 38                 | 19.04       |        |         |
| Lack of correlation                    | 722.90         | 36                 | 20.08       | 76.25  | 0.0130  |
| Pure error                             | 0.53           | 2                  | 0.26        |        |         |
| Corrected sum of squares (Cor. Total)  | 6790.41        | 44                 |             |        |         |
| Soybean waste biomass, Pb(II), $R(\%)$ |                |                    |             |        |         |
| Model                                  | 5888.99        | 6                  | 981.17      | 68.37  | <0.0001 |
| A                                      | 1046.40        | 1                  | 1046.40     | 72.91  | <0.0001 |
| B                                      | 982.26         | 1                  | 982.26      | 68.44  | <0.0001 |
| C                                      | 1231.92        | 1                  | 1231.92     | 86.84  | <0.0001 |
| D                                      | 789.71         | 1                  | 789.71      | 55.03  | <0.0001 |
| A <sup>2</sup>                         | 1835.45        | 1                  | 1835.45     | 127.89 | <0.0001 |
| B <sup>2</sup>                         | 76.48          | 1                  | 76.48       | 5.33   | 0.0265  |
| Residual                               | 545.36         | 38                 | 14.35       |        |         |
| Lack of correlation                    | 545.04         | 36                 | 15.14       | 92.69  | 0.0107  |
| Pure error                             | 0.33           | 2                  | 0.16        |        |         |
| Corrected sum of squares (Cor. Total)  | 6432.36        | 44                 |             |        |         |

**Table S4.** ANOVA for the polynomial (quadratic) model for  $q(\text{mg/g})$  in case of Pb(II) retention on soybean biomass and soybean waste biomass, respectively.

| Source                                          | Sum of Squares | Degrees of freedom | Square mean | F      | Prob>F  |
|-------------------------------------------------|----------------|--------------------|-------------|--------|---------|
| Soybean biomass, Pb(II), $q(\text{mg/g})$       |                |                    |             |        |         |
| Model                                           | 1137.99        | 8                  | 142.25      | 56.98  | <0.0001 |
| A                                               | 108.73         | 1                  | 108.73      | 43.55  | <0.0001 |
| C                                               | 563.11         | 1                  | 563.11      | 225.56 | <0.0001 |
| D                                               | 42.65          | 1                  | 42.65       | 17.08  | 0.0002  |
| C                                               | 563.11         | 1                  | 563.11      | 225.56 | <0.0001 |
| D                                               | 42.65          | 1                  | 42.65       | 17.08  | 0.0002  |
| E                                               | 47.14          | 1                  | 47.14       | 18.88  | 0.0001  |
| A <sup>2</sup>                                  | 63.79          | 1                  | 63.79       | 25.55  | <0.0001 |
| BC                                              | 31.20          | 1                  | 31.20       | 12.50  | 0.0011  |
| BD                                              | 10.81          | 1                  | 10.81       | 4.33   | 0.0446  |
| Residual                                        | 89.97          | 36                 | 2.50        |        |         |
| Lack of correlation                             | 89.61          | 34                 | 2.64        | 20.27  | 0.0481  |
| Pure error                                      | 0.26           | 2                  | 0.13        |        |         |
| Corrected sum of squares (Cor. Total)           | 1227.86        | 44                 |             |        |         |
| Soybean waste biomass, Pb(II), $q(\text{mg/g})$ |                |                    |             |        |         |
| Model                                           | 1611.23        | 8                  | 201.40      | 86.07  | <0.0001 |
| A                                               | 134.68         | 1                  | 134.68      | 57.56  | <0.0001 |
| B                                               | 479.50         | 1                  | 479.50      | 204.90 | <0.0001 |
| C                                               | 752.22         | 1                  | 752.22      | 321.45 | <0.0001 |
| D                                               | 6.16           | 1                  | 6.16        | 2.63   | 0.1134  |
| E                                               | 44.23          | 1                  | 44.23       | 18.9   | 0.0001  |
| A <sup>2</sup>                                  | 154.92         | 1                  | 154.92      | 66.20  | <0.0001 |
| BC                                              | 22.11          | 1                  | 22.11       | 0.45   | 0.0040  |
| DE                                              | 17.40          | 1                  | 17.40       | 7.44   | 0.0098  |
| Residual                                        | 84.24          | 36                 | 2.34        |        |         |
| Lack of correlation                             | 84.04          | 34                 | 2.47        | 23.92  | 0.0409  |
| Pure error                                      | 0.21           | 2                  | 0.1         |        |         |
| Corrected sum of squares (Cor. Total)           | 1695.48        | 44                 |             |        |         |
